# Supplementary material for: Unexpected ligand substitutions in the cluster core {Re6Se8}: synthesis and structure of the novel cluster compound Cs11(H3O)[Re6Se4O4Cl6]3·4H2O
Source: Royal Society of Chemistry journal article supplement (doi:10.1039/b412850h), 2004-12-21
Supplement: b412850h.pdf [file b412850h.pdf]

## Supplementary materials for article

### Unexpected ligand substitutions in the cluster core $\{\text{Re}_6\text{Se}_8\}$ : synthesis and structure of the novel cluster compound $\text{Cs}_{11}(\text{H}_3\text{O})[\text{Re}_6\text{Se}_4\text{O}_4\text{Cl}_6]_3 \cdot 4\text{H}_2\text{O}$

by S.S. Yarovoi, Y.V. Mironov, S.F. Solodovnikov, D.Y. Naumov, N.K. Moroz, S.G. Kozlova,  
A. Simon and V.E. Fedorov

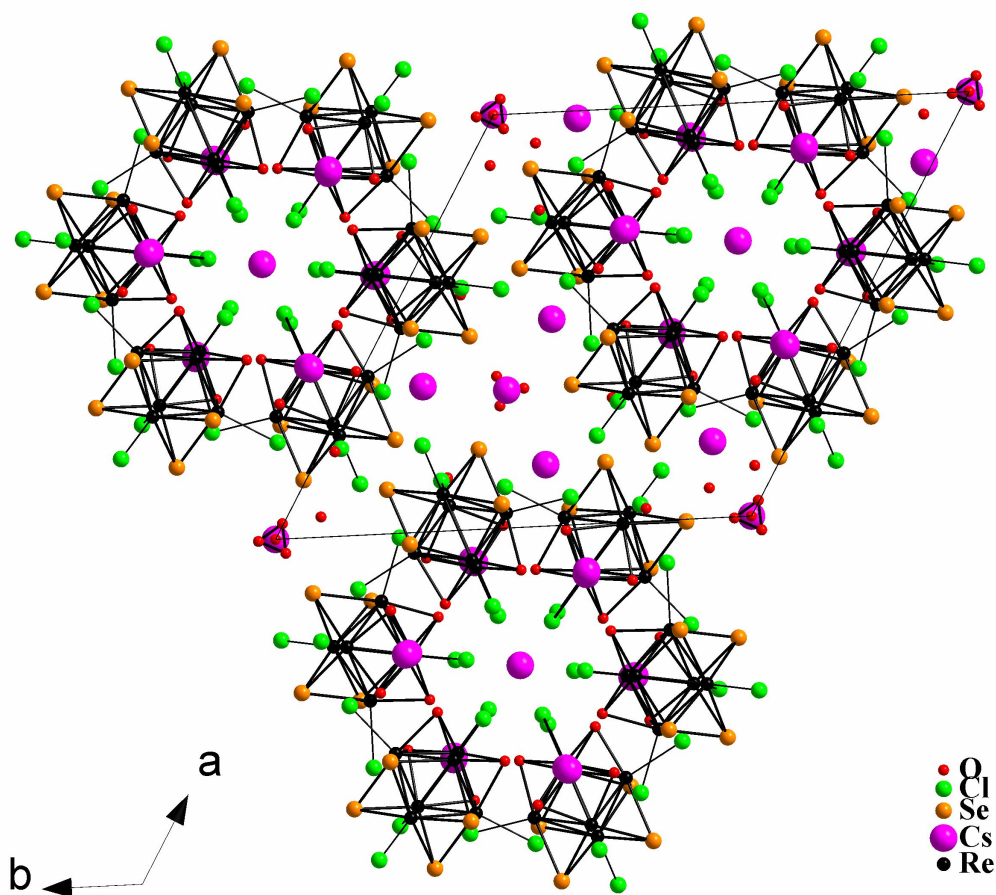

Figure S1. A fragment of a honeycomb-like double layer of  $\text{Cs}_{11}(\text{H}_3\text{O})[\text{Re}_6\text{Se}_4\text{O}_4\text{Cl}_6]_3 \cdot 4\text{H}_2\text{O}$ .

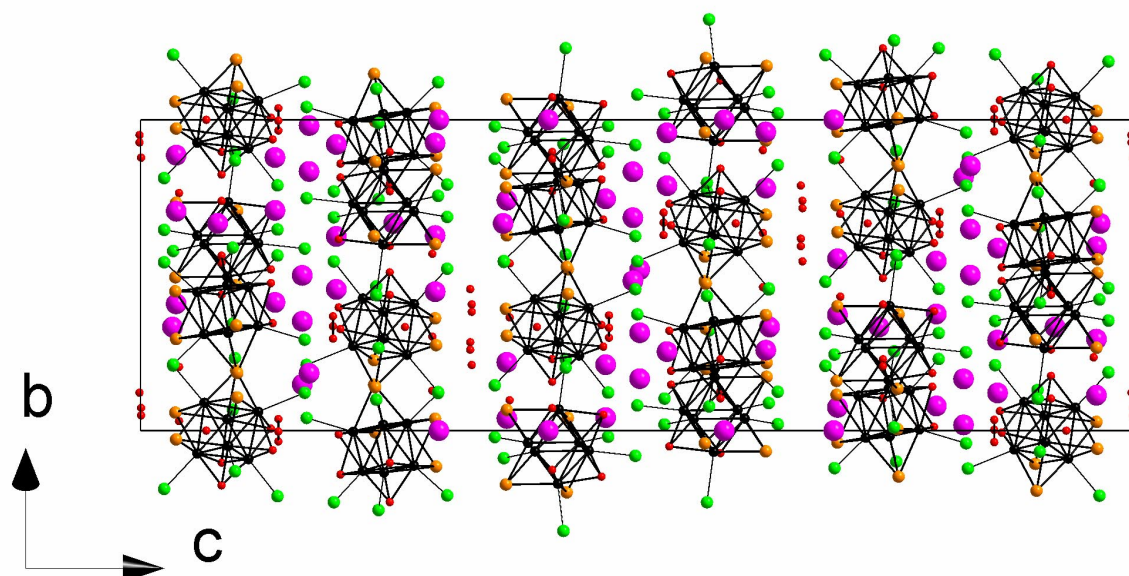

Figure S2. Unit cell of  $\text{Cs}_{11}(\text{H}_3\text{O})[\text{Re}_6\text{Se}_4\text{O}_4\text{Cl}_6]_3 \cdot 4\text{H}_2\text{O}$ . View along the a axes

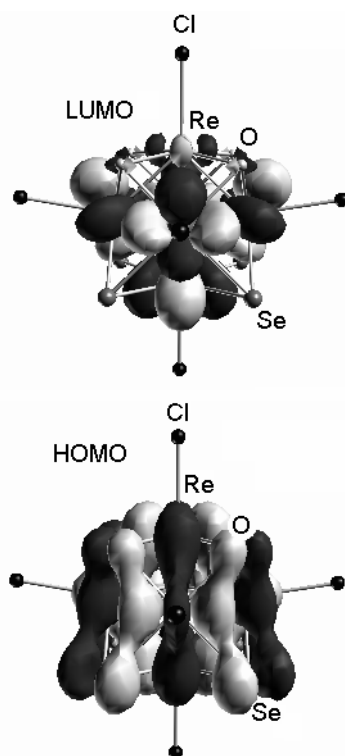

Figure S3. The schematic figures of HOMO and LUMO for  $\text{C}_{4v} \text{Re}_6\text{O}_4\text{Se}_4\text{Cl}_6$ . The non degenerated HOMO,  $44b_1$  is antibonding character and is formed from the valent 5d-orbitals of Re atoms ( $\sim 65\%$ ), with the O and Se valent  $p$ -orbitals contributions ( $\sim 12\%$  and  $\sim 17\%$ ). The non degenerated LUMO,  $45b_1$  is largely centered on the rhenium atoms ( $\sim 98\%$  of the valent 5d-orbitals). The calculated HOMO-LUMO energy gap is 2.56 eV.
